# Supplementary material for: Naked eye detection of nitric oxide release from nitrosothiols aided by gold nanoparticles
Source: Royal Society of Chemistry journal article supplement (doi:10.1039/c2an16182f), 2012-01-01
Supplement: c2an16182f.pdf [file c2an16182f.pdf]

Supplementary material (ESI) for Analyst communication

## Naked eye detection of Nitric oxide release from nitrosothiols aided by gold nanoparticles

Priya S., Kaviyaran T., Sheela Berchmans\*

Electrodeics and Electrocatalysis Division,  
CSIR-Central Electrochemical Research Institute, Karaikudi,  
Tamil Nadu, India. Fax: + 91-4565-227779; Tel: + 91-4565-227550;  
E-mail: sheelaberchmans@yahoo.com

TEM images of gold nanoparticles prepared using chitosan and citrate as stabilising agents

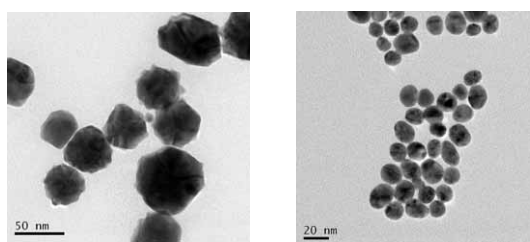

Fig. S1 TEM images of gold nanoparticles prepared (a) 50 nm (b) 20 nm.

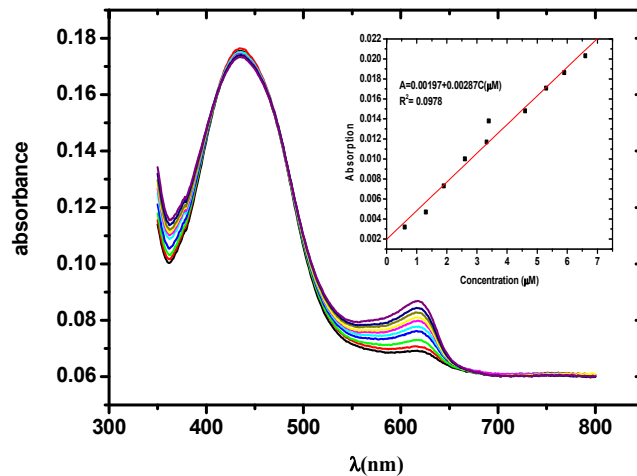

Fig. S2 UV-Vis spectra of CD-Fc in the presence of various concentration of NO. The spectra were recorded at pH < 3 in dil  $\text{H}_2\text{SO}_4$ . Each addition corresponds to 600 nM. Inset shows the calibration plot of absorbance vs concentration

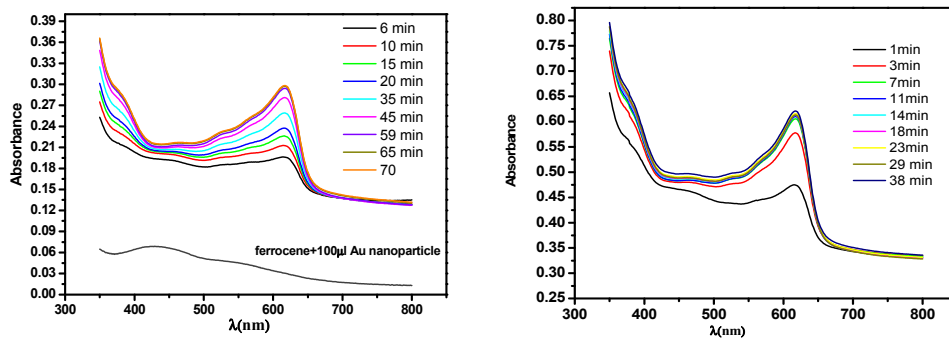

**Fig. S3** Decomposition of RSNO monitored spectrophotometrically with respect to ferrocenyl cation formation in the presence of gold nanoparticles (a) 50 nm (b) 20 nm

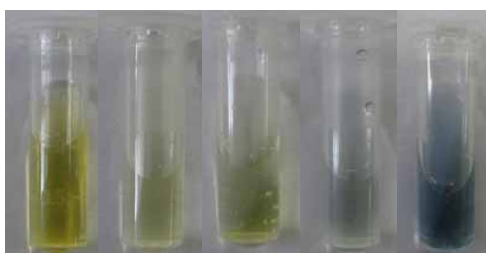

**Fig. S4** Colour change observed during NO release from RSNO

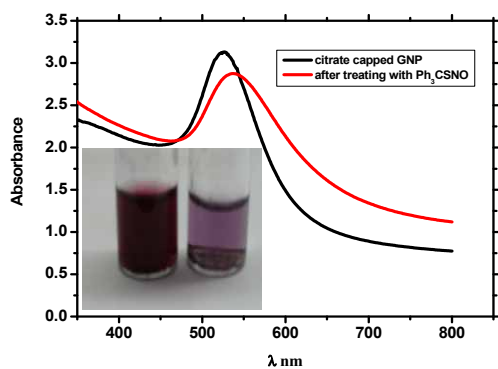

**Fig. S5** UV-Vis spectrum showing red shift for citrate capped GNP after treating with  $\text{Ph}_3\text{CSNO}$ . Inset shows colour change observed form burgundy to blue

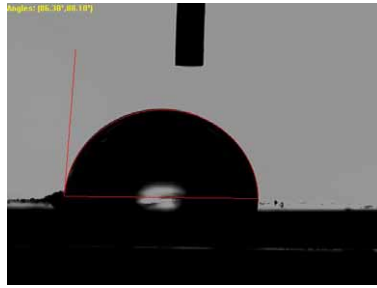

(a)

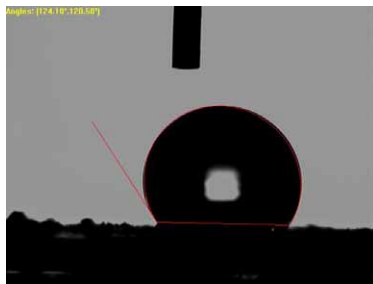

(b)

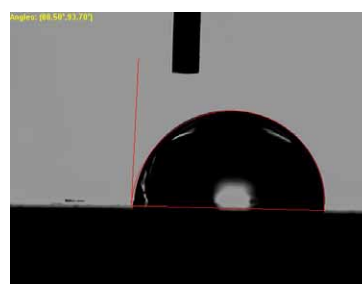

(c)

**Fig.S6** Contact angle measurement confirming GNP-SR bond formation (a) Au-Chitosan-GNP – 86° (b) Au-Chitosan-GNP-Ph<sub>3</sub>CSNO – 124° (c) Au-Chitosan-Ph<sub>3</sub>CSNO – 88°
